# Supplementary material
Source: MDPI journal article supplement (https://www.mdpi.com/2073-445X/13/1/82)
Supplement: s1 [file s1]

## Supplementary material

**Table S1.** Sub-regional land use transfer matrix.

| Zone | Type         | Cropland | Forest | Grassland | Water | Barren | Impervious | Total |
|------|--------------|----------|--------|-----------|-------|--------|------------|-------|
| NN   | Cropland     |          | 3944   | 15088     | 82    | 51     | 19         | 19184 |
|      | Forest       | 16826    |        | 10594     | 8     | 0      | 0          | 27428 |
|      | Grassland    | 27188    | 737    |           | 52    | 883    | 0          | 28860 |
|      | Water        | 541      | 10     | 99        |       | 8      | 232        | 890   |
|      | Unused land  | 40       | 0      | 473       | 2     |        | 0          | 515   |
|      | Construction | 2226     | 81     | 431       | 136   | 13     |            | 2887  |
|      | Total        | 46821    | 4772   | 26685     | 280   | 955    | 251        |       |
| WN   | Cropland     | 0        | 16816  | 22968     | 567   | 1584   | 55         | 41990 |
|      | Forest       | 26723    | 0      | 18801     | 125   | 20     | 1          | 45670 |
|      | Grassland    | 29316    | 3438   | 0         | 1302  | 62238  | 1          | 96295 |
|      | Water        | 1462     | 58     | 5228      | 0     | 7858   | 404        | 15010 |
|      | Unused land  | 267      | 1      | 57594     | 1497  | 0      | 1          | 59360 |
|      | Construction | 5275     | 209    | 841       | 303   | 165    | 0          | 6793  |
|      | Total        | 63043    | 20522  | 105432    | 3794  | 71865  | 462        |       |
| SN   | Cropland     | 0        | 36482  | 5189      | 407   | 4      | 37         | 42119 |
|      | Forest       | 29434    | 0      | 5610      | 60    | 1      | 1          | 35106 |
|      | Grassland    | 2992     | 1123   | 0         | 27    | 22     | 0          | 4164  |
|      | Water        | 1151     | 80     | 125       | 0     | 11     | 216        | 1583  |
|      | Unused land  | 3        | 1      | 13        | 3     | 0      | 0          | 20    |
|      | Construction | 3384     | 259    | 108       | 79    | 10     | 0          | 3840  |
|      | Total        | 36966    | 37945  | 11047     | 578   | 48     | 255        |       |

The unit is  $km^2$ .

**Table S2.** The average change in ESs.

| Year | Zone  | Index | CS     | HQ   | SC     | WF    | WY      |
|------|-------|-------|--------|------|--------|-------|---------|
| 2000 | SN    | 0.15  | 844.14 | 0.82 | 629.86 | 22.31 | 1233.62 |
|      | NN    | 0.15  | 608.72 | 0.73 | 570.19 | 78.03 | 610.80  |
|      | WN    | 0.12  | 427.58 | 0.60 | 614.11 | 66.34 | 469.35  |
|      | Total | 0.14  | 532.26 | 0.66 | 611.61 | 65.32 | 634.37  |
| 2005 | SN    | 0.15  | 868.02 | 0.82 | 618.75 | 48.27 | 1111.54 |
|      | NN    | 0.13  | 675.21 | 0.74 | 500.15 | 86.04 | 591.31  |
|      | WN    | 0.11  | 460.78 | 0.60 | 546.54 | 93.50 | 444.40  |
|      | Total | 0.12  | 567.84 | 0.66 | 553.89 | 79.63 | 592.78  |

|      |       |      |         |      |        |       |         |
|------|-------|------|---------|------|--------|-------|---------|
| 2013 | SN    | 0.16 | 1050.17 | 0.81 | 623.39 | 46.34 | 1098.79 |
|      | NN    | 0.15 | 821.69  | 0.75 | 538.58 | 93.14 | 617.61  |
|      | WN    | 0.11 | 520.13  | 0.60 | 571.69 | 77.80 | 442.71  |
|      | Total | 0.12 | 662.32  | 0.66 | 576.96 | 73.55 | 592.78  |
| 2015 | SN    | 0.17 | 1064.14 | 0.81 | 889.24 | 38.45 | 1336.16 |
|      | NN    | 0.15 | 805.20  | 0.76 | 528.94 | 90.57 | 588.39  |
|      | WN    | 0.12 | 457.17  | 0.60 | 537.09 | 93.01 | 394.28  |
|      | Total | 0.14 | 620.34  | 0.66 | 599.44 | 81.95 | 602.40  |
| 2018 | SN    | 0.17 | 1122.8  | 0.81 | 722.46 | 34.35 | 1262.52 |
|      | NN    | 0.16 | 850.99  | 0.76 | 424.35 | 94.30 | 583.87  |
|      | WN    | 0.13 | 471.22  | 0.61 | 638.67 | 90.93 | 464.76  |
|      | Total | 0.14 | 647.15  | 0.67 | 627.71 | 80.21 | 635.29  |

The unit of CS is  $kgC \cdot m^{-2}$ ; HQ is dimensionless and ranges from 0 to 1; the unit of SC and WF are  $t \cdot hm^{-2}$ ; the unit of WY is  $mm$ .

**Table S3.** MGWR model index.

|                         | Bandwidth | ENP_j | Adj t-val(95%) | DoD_j |
|-------------------------|-----------|-------|----------------|-------|
| Intercept               | 43        | 39.97 | 3.241          | 0.434 |
| Cropland                | 658       | 1.19  | 2.040          | 0.972 |
| Forest                  | 508       | 1.64  | 2.168          | 0.924 |
| Grassland               | 257       | 6.53  | 2.675          | 0.712 |
| Water                   | 676       | 1.05  | 1.985          | 0.992 |
| Unused land             | 587       | 3.18  | 2.422          | 0.822 |
| Construction            | 676       | 1.88  | 2.222          | 0.903 |
| Land use intensity      | 676       | 1.43  | 2.114          | 0.945 |
| Population Urbanization | 524       | 2.51  | 2.336          | 0.858 |
| Economic Urbanization   | 91        | 17.33 | 2.991          | 0.562 |
| Economic Urbanization   | 445       | 3.15  | 2.418          | 0.824 |

$R^2$  is 0.759.

**Table S4.** Future land prediction under different SSP-RCP scenarios.

|          | Cropland | Forest | Grassland | Water | Barren | Impervious |
|----------|----------|--------|-----------|-------|--------|------------|
| SSP1-2.6 | 306533   | 874213 | 2271264   | 50705 | 389110 | 32663      |
| SSP2-4.5 | 310402   | 819107 | 2321950   | 51237 | 389119 | 32673      |
| SSP4-6.0 | 314998   | 828969 | 2307787   | 50968 | 389106 | 32660      |
| SSP5-8.5 | 312032   | 837005 | 2302612   | 51055 | 389115 | 32669      |

The unit is  $km^2$ .

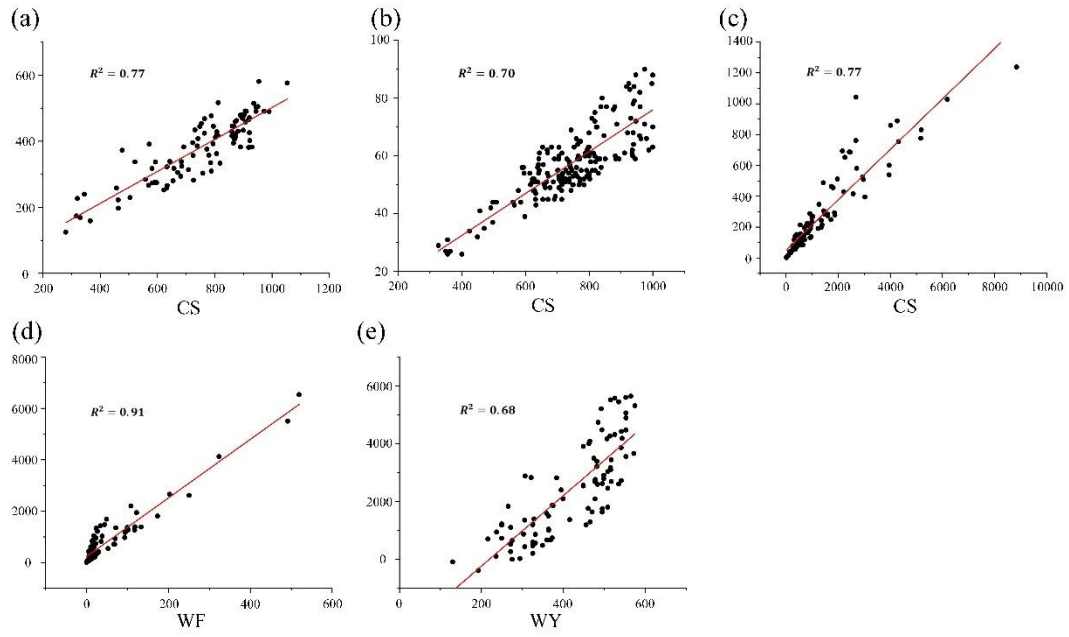

**Figure S1.** a-e are linear regression scatter plots of carbon sequestration, habitat quality, soil conservation, windbreak sand fixation, and water yield and verification data.

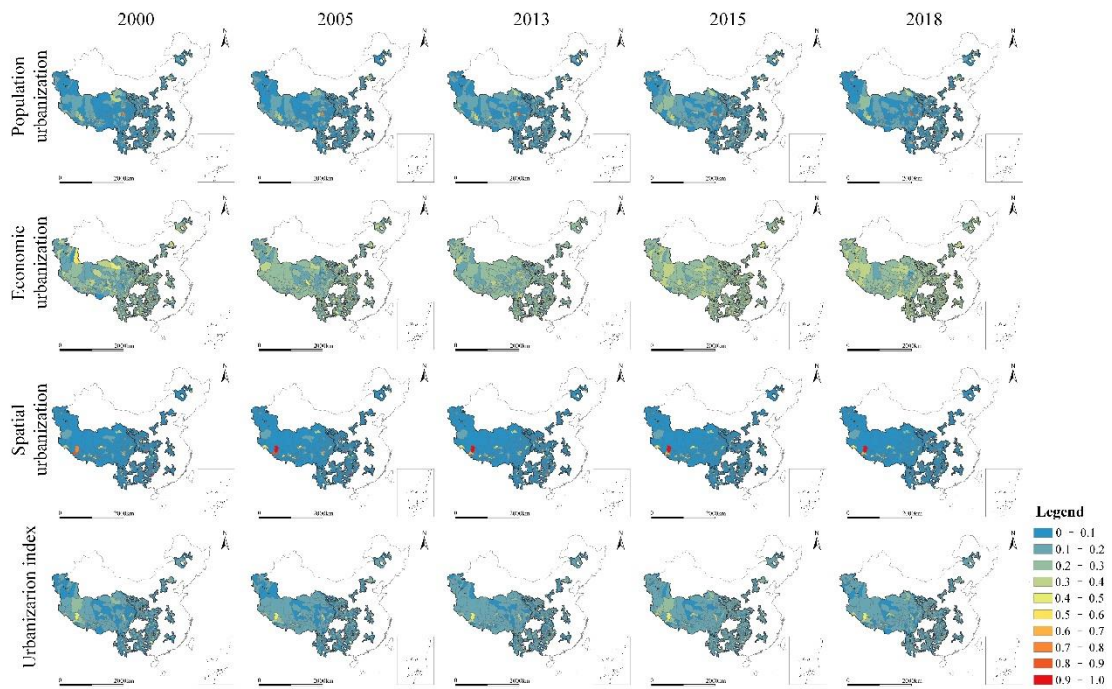

**Figure S2.** Spatial distribution of urbanization indicators

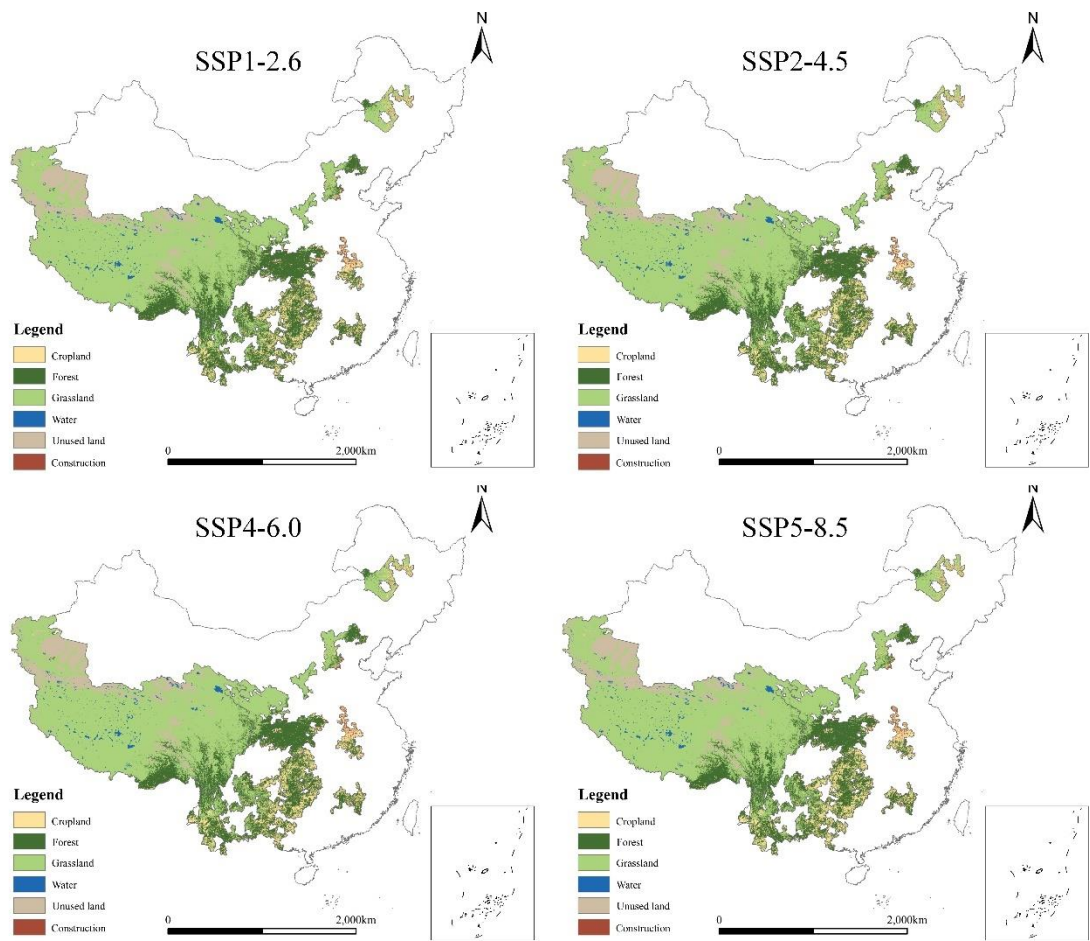

**Figure S3.** Land use distribution in 2035 under different SSP-RCP scenarios.
